# Supplementary material for: High ionic conductivity and ion conduction mechanism in ZIF-8 based quasi-solid-state electrolytes: a positron annihilation and broadband dielectric spectroscopy study
Source: Royal Society of Chemistry journal article supplement (doi:10.1039/d2cp03451d), 2022-01-01
Supplement: d2cp03451d1.pdf [file d2cp03451d1.pdf]

## High Ionic Conductivity and Ion Conduction Mechanism in ZIF-8 Based Quasi-Solid-State Electrolytes: a Positron Annihilation and Broadband Dielectric Spectroscopy Study

P. Utpalla<sup>1,†</sup>, J. Mor<sup>1</sup>, S. K. Sharma<sup>1,†\*</sup> and P. K. Pujari<sup>1,†</sup>

<sup>1</sup>Radiochemistry Division, Bhabha Atomic Research Centre, Mumbai, India 400 085

<sup>†</sup>Homi Bhabha National Institute, Anushaktinagar, Mumbai, India 400 094

\*Corresponding author: [skumars@barc.gov.in](mailto:skumars@barc.gov.in)

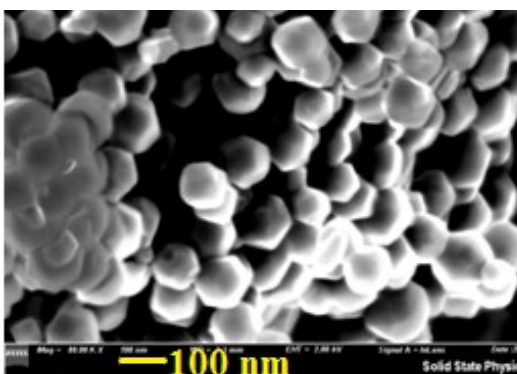

**Figure S1.** SEM image of the synthesized ZIF-8 nanoparticles; scale bar at the bottom denotes 100 nm.

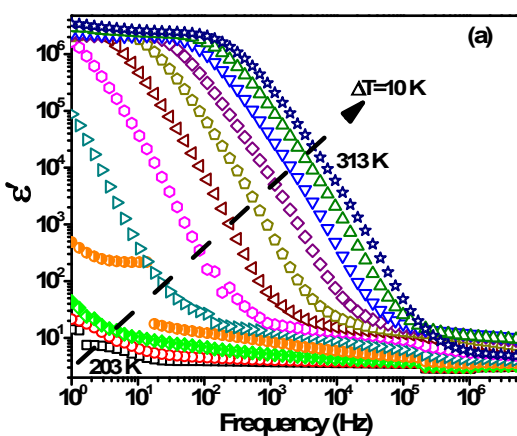

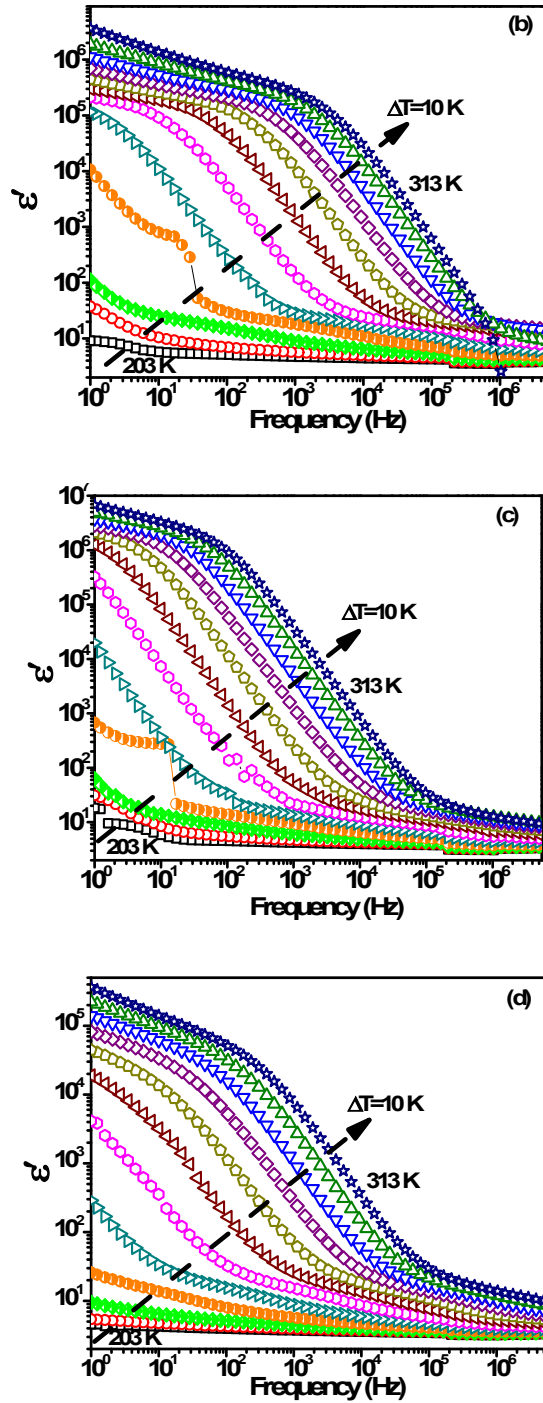

**Figure S2.** Real part ( $\epsilon'$ ) of the complex permittivity for (a) Z-0 (b) Z-10 (c) Z-50 (d) Z-70 QSSEs.

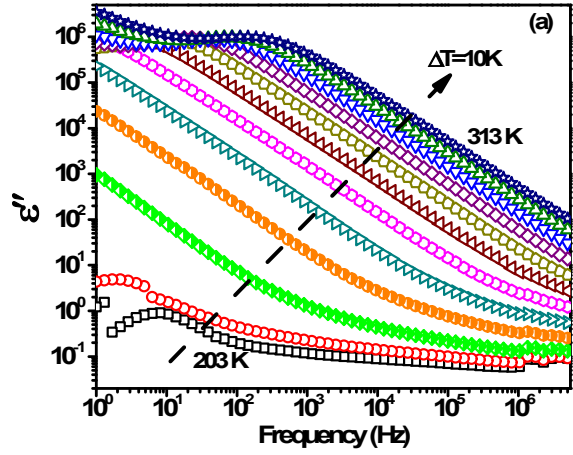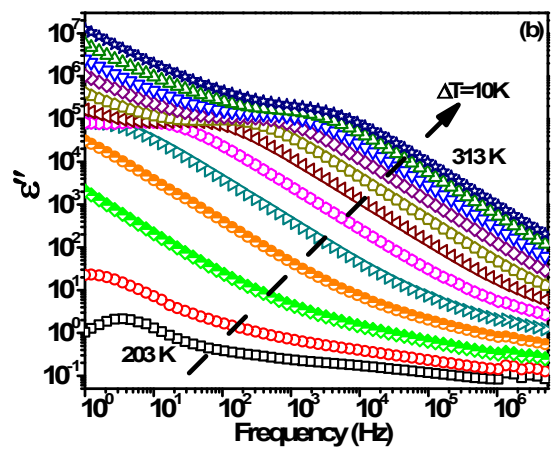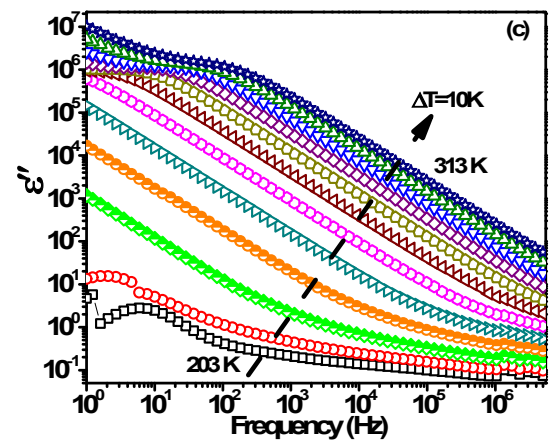

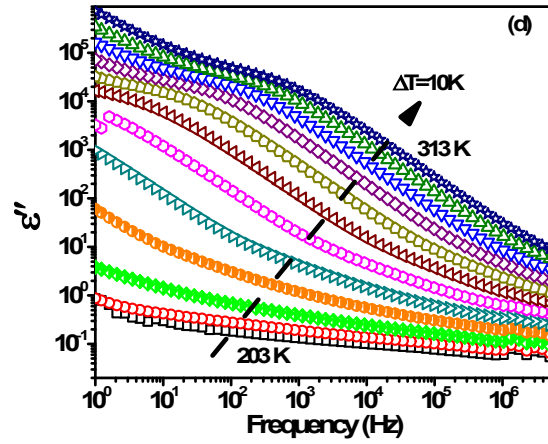

**Figure S3.** Imaginary part ( $\epsilon''$ ) of the complex permittivity for (a) Z-0 (b) Z-10 (c) Z-50 (d) Z-70 QSSEs.

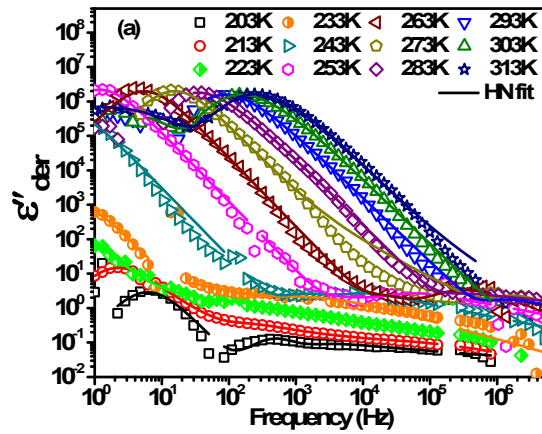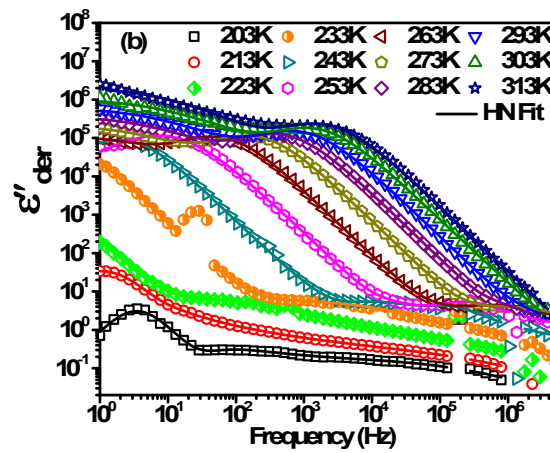

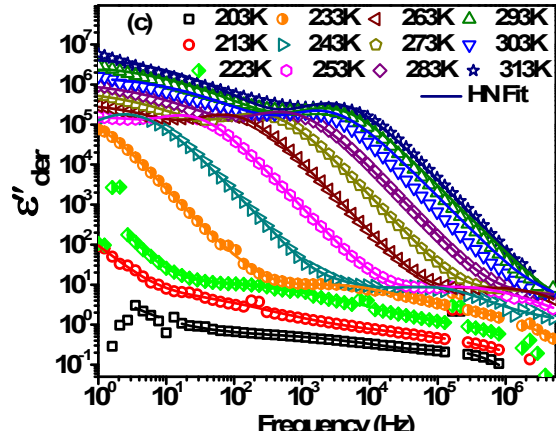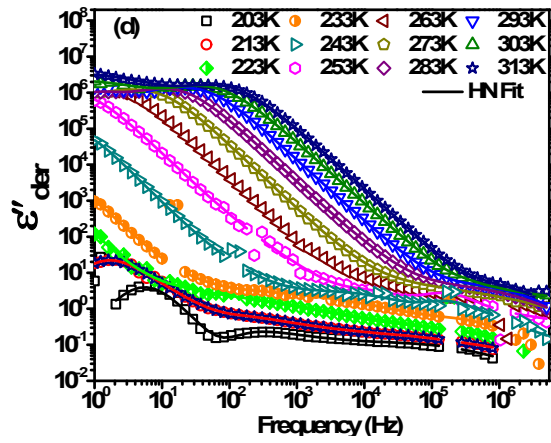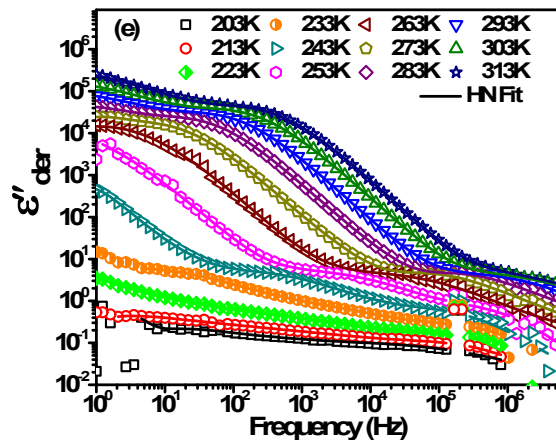

**Figure S4.** dc conduction free dielectric permittivity for (a) Z-0 (b) Z-10 (c) Z-30 (d) Z-50 (e) Z-70 QSSEs. Solid lines show the fit of experimental data using HN formalism.

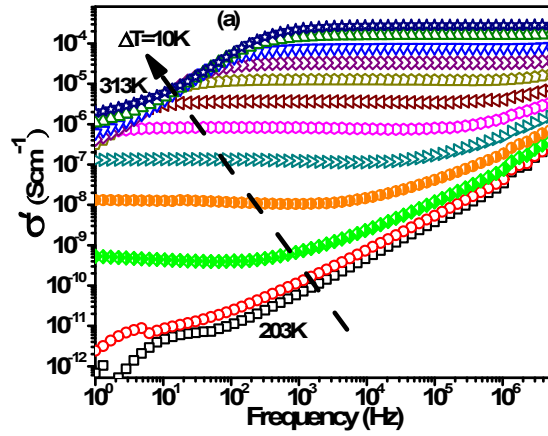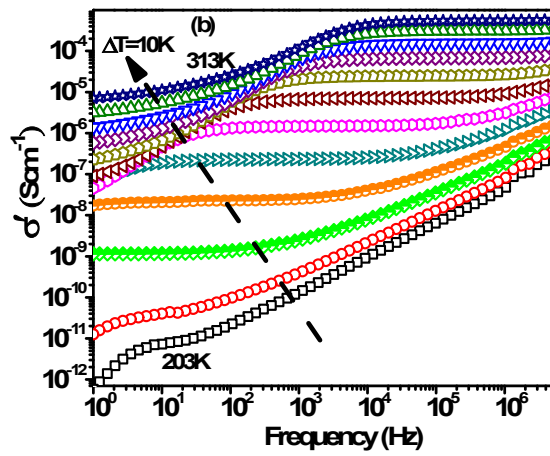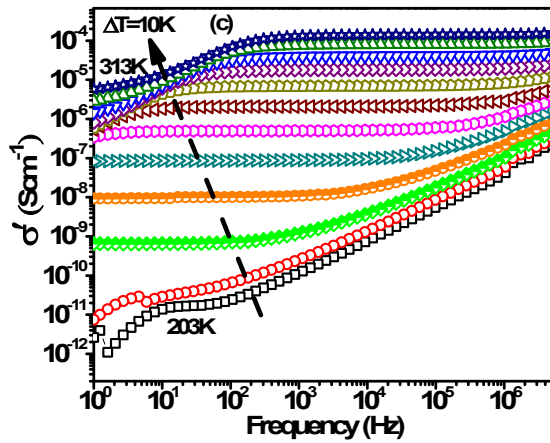

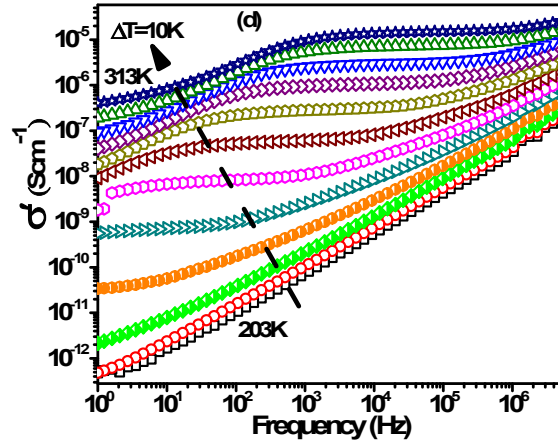

**Figure S5.** Real part ( $\sigma'$ ) of the complex conductivity for (a) Z-0 (b) Z-10 (c) Z-50 (d) Z-70 QSSEs.

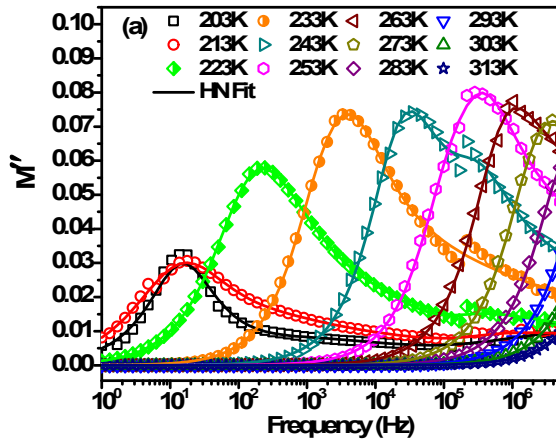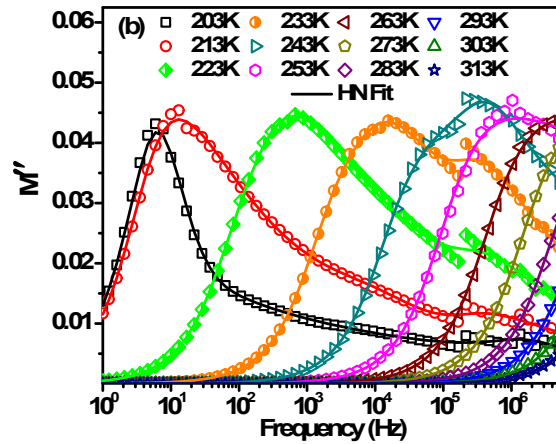

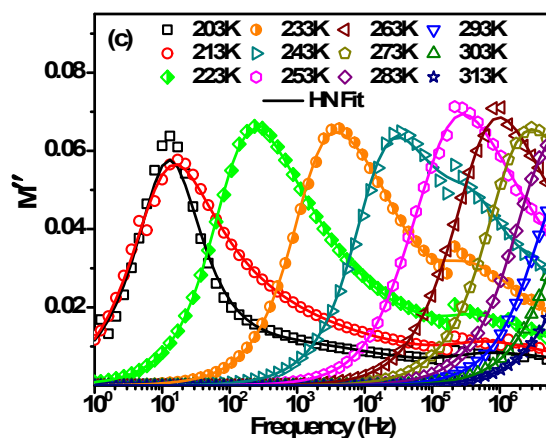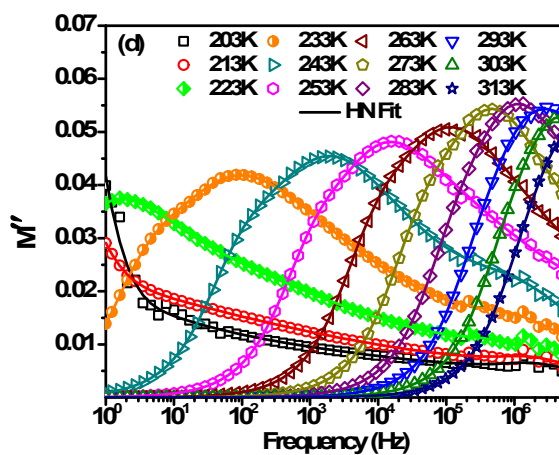

**Figure S6.** Imaginary part of modulus,  $M''$ , variation with frequency for (a) Z-0 (b) Z-10 (c) Z-50 (d) Z-70 QSSEs. Solid lines show the fit of experimental data using HN formalism.

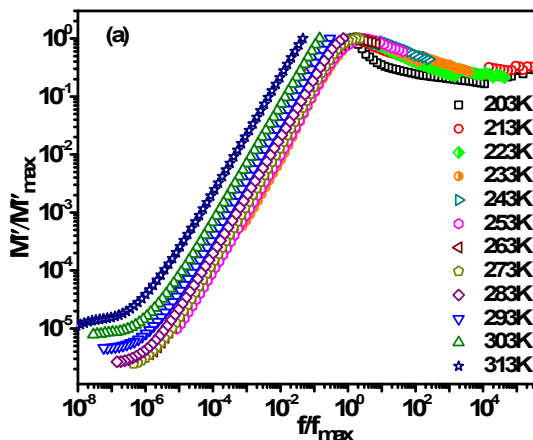



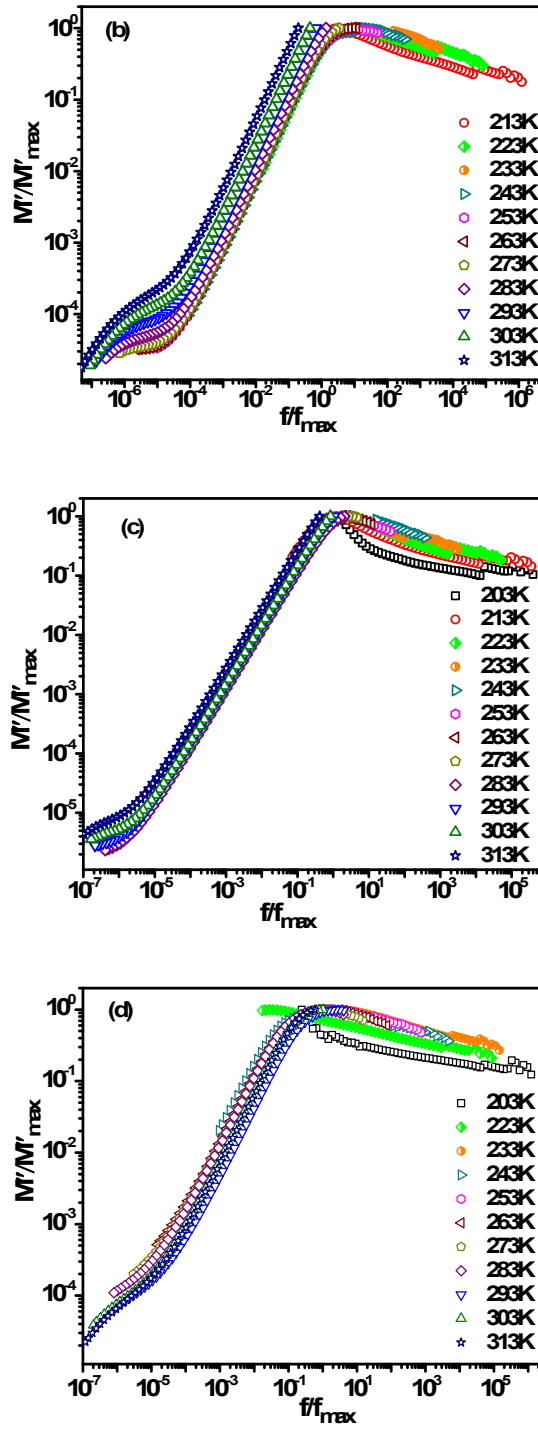

**Figure S7.** Master curve by maxima normalization technique for (a) Z-0 (b) Z-10 (c) Z-50 (d) Z-70 QSSes.

**Table S1:** *o*-Ps annihilation parameters for ZIF-8-LiTFSI from PALS

| Sample | $\tau_1$ (ns) | $I_1$ (%)  | $\tau_2$ (ns) | $I_2$ (%)  | $\tau_3$ (ns) | $I_3$ (%)  | $\tau_4$ (ns) | $I_4$ (%)  |
|--------|---------------|------------|---------------|------------|---------------|------------|---------------|------------|
| ZIF-8- | 0.19          | 32.48      | 0.49          | 49.10      | 2.41          | 14.33      | 8.34          | 4.09       |
| LiTFSI | $\pm 0.01$    | $\pm 1.68$ | $\pm 0.01$    | $\pm 1.47$ | $\pm 0.07$    | $\pm 0.24$ | $\pm 0.33$    | $\pm 0.26$ |
